# Supplementary material
Source: PubMed Central journal article supplement (PMC6830526)
Supplement: NIHMS1540591-supplement-315786_Acknowledgment_Permissions.pdf [file NIHMS1540591-supplement-315786_Acknowledgment_Permissions.pdf]

## **circres**

---

**From:** Prohaska, Thomas <tprohaska@ucsd.edu>  
**Sent:** Friday, September 13, 2019 12:13 PM  
**To:** circres  
**Subject:** Acknowledgement permission

**\*\*\* CAUTION:** This email originated from outside of the **American Heart Association**. Do **not** click links or open attachments unless you recognize the sender and know the content is safe. **\*\*\***

Dear Circ Research Team,  
I hereby give permission to be acknowledged in manuscript CIRCRES/2019/315786D. Please let me know in case you need any further information.

Sincerely,  
Thomas Prohaska

Thomas Prohaska, M.D.  
Cardiovascular Disease Fellow  
UC San Diego  
9500 Gilman Drive #0651  
La Jolla, CA 92093-0651  
phone: 858-534-8867

## **circres**

---

**From:** Fabrizio Drago <fd2u@virginia.edu>  
**Sent:** Friday, September 13, 2019 4:02 PM  
**To:** circres  
**Subject:** Circulation Research acknowledgment

**\*\*\* CAUTION:** This email originated from outside of the **American Heart Association**. Do **not** click links or open attachments unless you recognize the sender and know the content is safe. **\*\*\***

To whom this may concern,

I am writing to you to give you permission to be acknowledged for the manuscript ID# CIRCRES/2019/315786D.

Thank you.

Best,  
Fabrizio

Fabrizio Drago  
Clinical Research Coordinator  
University of Virginia School of Medicine  
Cardiovascular Research Center | McNamara Lab  
415 Lane Rd (MR5); PO Box 801394  
Charlottesville, VA 22908-1394

## Gemma Bridges-Lyman

---

**From:** Naomi Tsuji <Naomi.Tsuji@med.wmich.edu>  
**Sent:** Monday, September 16, 2019 9:15 AM  
**To:** circres  
**Cc:** Aditi Upadhye  
**Subject:** CIRCRES/2019/315786D

**\*\*\* CAUTION:** This email originated from outside of the **American Heart Association**. Do **not** click links or open attachments unless you recognize the sender and know the content is safe. **\*\*\***

To whom it may concern,

I was acknowledged in a paper, reference # CIRCRES/2019/315786D. I give my permission to be acknowledged.

Thank you.

Naomi Tsuji

---

This electronic message is intended for the named recipient(s) only, and may contain information that is confidential or privileged. If you are not the named recipient, you are hereby notified that any disclosure, copying, distribution, or use of the contents of this message is strictly prohibited. If you have received this message in error, or are not the named recipient, please notify us immediately by contacting the sender at the electronic mail address noted above, and delete and destroy all copies of this message. Thank you.

## **circres**

---

**From:** Chew, Claude (cc6ea) <cc6ea@virginia.edu>  
**Sent:** Friday, September 13, 2019 8:53 AM  
**To:** circres  
**Cc:** Aditi Upadhye  
**Subject:** Permission to be acknowledged on manuscript ID #CIRCRES/2019/315786D

**\*\*\* CAUTION:** This email originated from outside of the **American Heart Association**. Do **not** click links or open attachments unless you recognize the sender and know the content is safe. **\*\*\***

Dear Circ Research,

I am writing to grant permission to be acknowledged on manuscript ID #CIRCRES/2019/315786D

Thanks very much,  
Claude

Claude Chew, BS SCYM  
Flow Cytometry Core Specialist Senior  
University of Virginia  
Pinn Hall Rm 2011  
1340 Jefferson Park Ave  
Charlottesville, VA 22908  
Lab Phone: 434-243-2711

## **circres**

---

**From:** Solga, Michael Dimitri (mds4z) <mds4z@virginia.edu>  
**Sent:** Friday, September 13, 2019 8:40 AM  
**To:** circres  
**Subject:** acknowledgment #CIRCRES/2019/315786D

**\*\*\* CAUTION:** This email originated from outside of the **American Heart Association**. Do **not** click links or open attachments unless you recognize the sender and know the content is safe. **\*\*\***

Hello

I want to confirm/accept the acknowledgment given to the UVA flow cytometry core for manuscript #CIRCRES/2019/315786D

Thankyou  
Michael Solga

Michael Solga, MS, SCYM  
Interim Director, Flow Cytometry Core  
University of Virginia  
School of Medicine  
1340 Jefferson Park Ave.  
Pinn Hall, Rm 2011  
Charlottesville, VA 22908

## **circres**

---

**From:** Lannigan, Joanne (jl7f) <jlannigan@virginia.edu>  
**Sent:** Friday, September 13, 2019 9:51 AM  
**To:** circres  
**Subject:** Re: #CIRCRES/2019/315786D

**\*\*\* CAUTION:** This email originated from outside of the **American Heart Association**. Do **not** click links or open attachments unless you recognize the sender and know the content is safe. **\*\*\***

To Whom It May Concern:

I am providing my permission for manuscript #CIRCRES/2019/315786D to utilize my name in the acknowledgements.

Sincerely,

Joanne Lannigan, MS (retired)  
Previous, Director, Flow Cytometry Core  
University of Virginia  
School of Medicine  
1300 Jefferson Park Ave.  
Pinn Hall, Rm 2011A  
Charlottesville, VA 22908-0734  
[flowcytometry@virginia.edu](mailto:flowcytometry@virginia.edu)  
office: 434-924-0274  
lab: 434-243-2711  
cell: 540-207-6710  
<https://www.facebook.com/uvaflow/>  
<https://med.virginia.edu/flow-cytometry-facility/>
